# Supplementary material
Source: PubMed Central journal article supplement (PMC6488456)
Supplement: NIHMS995032-supplement-Supp_info.pdf [file NIHMS995032-supplement-Supp_info.pdf]

## Supplementary Table 1

### Details of primers used in quantitative RT-PCR analysis

| Species | Gene name  | Primer Sequence [5'→3'] or product name              | Supplier   |
|---------|------------|------------------------------------------------------|------------|
| mouse   | DAP12      | Mm_Tyrobp_1_SG QuantiTect Primer Assay<br>QT00129514 | Qiagen     |
|         | TREM1      | Mm_Trem1_1_SG QuantiTect Primer Assay,<br>QT00153979 | Qiagen     |
|         | TREM2      | Mm_Trem2_1_SG QuantiTect Primer Assay,<br>QT00157969 | Qiagen     |
|         | IDO        | F GACCACCACATAGATGAAG<br>R GGCCCAACTTCTCTGAGAGC      | Invitrogen |
|         | arginase-1 | F CAGAAGAATGGAAGAGTCG<br>R CAGATATGCAGGGAGTCAC       | Invitrogen |
|         | GAPDH      | F GCATTGTGGAAGGGCTCA<br>R AAGTCGCAGGAGACAACC         | Invitrogen |
| human   | DAP12      | Hs_TYROBP_1_SG QuantiTect Primer Assay<br>QT00077518 | Qiagen     |
|         | TREM1      | Hs_TREM1_1_SG QuantiTect Primer Assay<br>QT00046284  | Qiagen     |
|         | TREM2      | Hs_TREM2_1_SG QuantiTect Primer Assay<br>QT00063868  | Qiagen     |
|         | GAPDH      | Hs_GAPDH_1_SG QuantiTect Primer Assay<br>QT00079247  | Qiagen     |

Abbreviations: F, Forward; R, Reverse

## Supplementary Figure

### Supplementary Fig. 1

Expression of TREM1 by (A) conventional myeloid DC freshly-isolated from various mouse tissues, (B) various mouse liver immune cells compared with DC and (C) DC and other human liver immune cells. Data are means + 1 SEM obtained from 6-8 mice and from histologically normal human liver specimens of 3 individuals. \* $p < 0.05$ ; \*\* $p < 0.01$

**A Mouse tissue DC****B Mouse liver immune cells****C Human liver immune cells**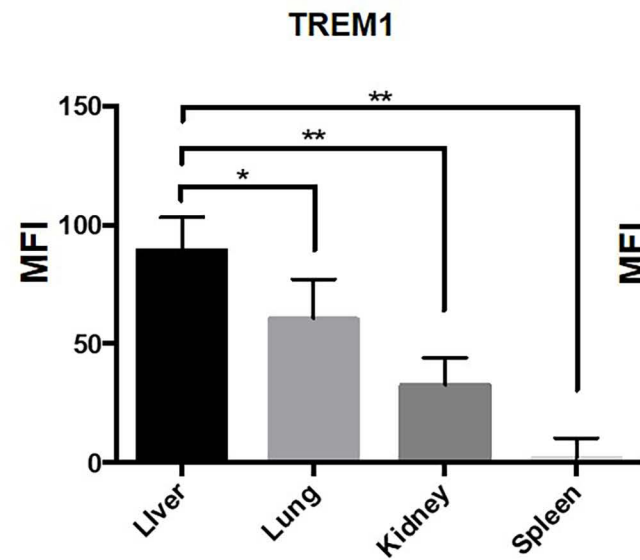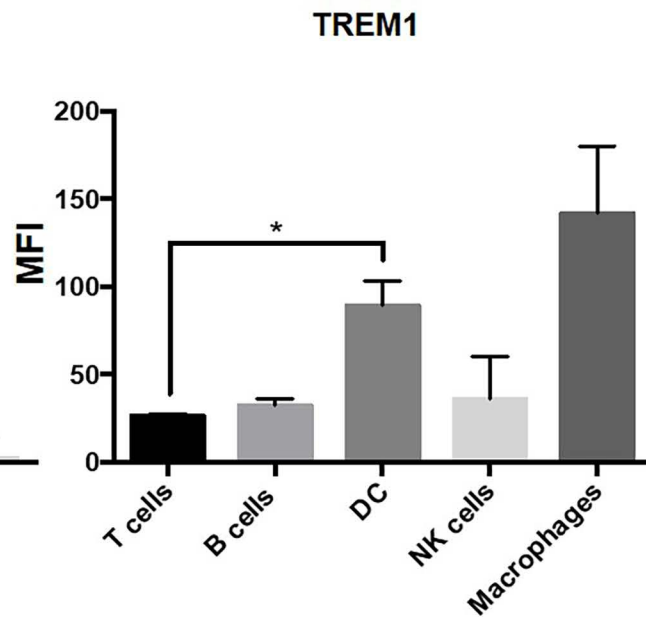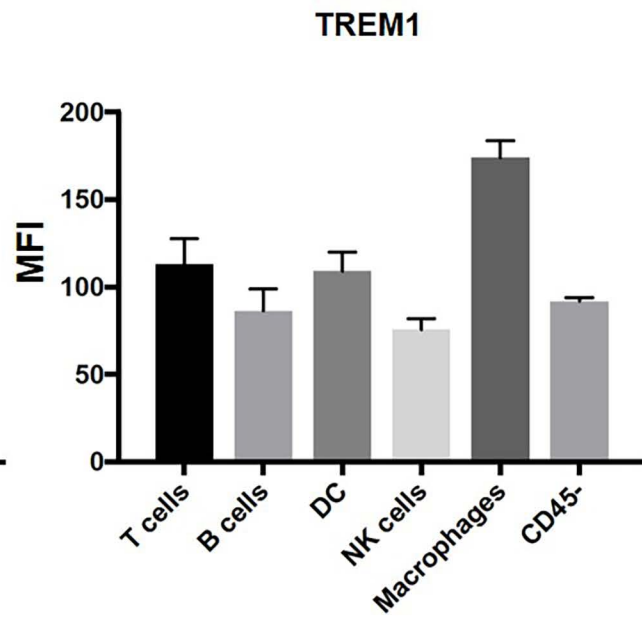

## **Supplementary Methods**

### **REAGENTS**

Complete culture medium comprised RPMI-1640 (BioWhittaker, Walkersville, MD) supplemented with 10% (v/v) fetal calf serum (Nalgene, Miami, FL) and non-essential amino acids, L-glutamine, sodium pyruvate, penicillin–streptomycin and 2-mercaptoethanol all from Life Technologies (Gaithersburg, MD). Type I collagenase was from Worthington Biochemical Co. (Lakewood, NJ). *E. coli* LPS was from InvivoGen (San Diego, CA).

### **MIXED LEUKOCYTE REACTIONS (MLR)**

For mouse MLR, T cells were negatively selected from bulk splenocytes by magnetic-activated cell sorting (MACS) using Dynabeads (Invitrogen, Grand Island, NY) following incubation with an antibody (Ab) cocktail comprising anti( $\alpha$ )-CD45R/B220 (clone#: RA3-6B2),  $\alpha$ -CD16/CD32 (2.4G2),  $\alpha$ -TER-119,  $\alpha$ -CD11b (M1/70) and  $\alpha$ -Ly6G (RB-8C5) (all BD Bioscience, San Diego, CA). They were then stained with carboxyfluorescein diacetate succinimidyl ester (CFSE) (Invitrogen, Waltham, MA), as described<sup>(1)</sup>. Liver and spleen DC were freshly-isolated using  $\alpha$ -CD11c immunobeads (Miltenyi Biotec, San Diego, CA),  $\gamma$ -irradiated (30Gy) and used as stimulators or regulators at a 1 DC : 10 T cell ratio. Cultures were maintained in RPMI-1640 complete medium for 5 days in 5% CO<sub>2</sub>-in-air, using 96-well, round-bottom plates (Corning, NY), at a concentration of  $2 \times 10^5$  DC and  $2 \times 10^6$  T cells/well. T cell proliferation was determined by CFSE dilution. For human MLR, T cells were isolated from peripheral blood mononuclear cells (PBMC) using Pan T cell kits (BD) and liver DC isolated using Pan DC kits (BD). The DC were  $\gamma$ -irradiated (30Gy) and tested as regulators at a ratio of 1 DC:10 T cell ratio. Cultures were maintained in RPMI-1640 complete medium, as described for mouse MLR.

### **REAL-TIME REVERSE-TRANSCRIPTION POLYMERASE CHAIN REACTION (RT-PCR)**

Total RNA was extracted using Qiagen RNeasy Mini Kits (Qiagen, Hilden, Germany) as per the manufacturer's instructions. RNA was quantified using a Take3 Gen5 spectrophotometer (BioTek, Winooski, VT). One  $\mu$ g of RNA was treated with DNase I (amplification grade; Invitrogen) then

reverse-transcribed using Superscript III First Strand Synthesis SuperMix (Invitrogen). cDNA was amplified using Platinum Quantitative PCR SuperMix-UDG (Invitrogen) in 20  $\mu$ l volumes in quadruplicate with gene-specific primers and probed on the ABI Prism 7900HT Sequence Detection System (Applied Biosystems, Foster City, CA) according to the manufacturer's instructions. Thermal cycling conditions were 50°C for 2 min then 95°C for 2 min, followed by 40 cycles of 95°C for 15 sec and 60°C for 1 min. Data were analyzed using the  $\Delta\Delta$ Ct method with expression normalized to the housekeeping gene, glyceraldehyde-3-phosphate dehydrogenase (GAPDH).

Primer sequences used are shown in Supplementary Table 1.

## **Reference**

1. Yoshida O, Kimura S, Dou L, Matta BM, Yokota S, Ross MA, Geller DA, et al. DAP12 deficiency in liver allografts results in enhanced donor DC migration, augmented effector T cell responses and abrogation of transplant tolerance. *Am J Transplant* 2014;14:1791-1805.
